# Supplementary material for: A geophone-based and low-cost data acquisition and analysis system designed to microtremor measurements
Source: Copernicus journal article supplement (doi:10.5194/gi-2020-11), 2020-05-26
Supplement: Supplementary file [file gi-2020-11-RC1-supplement.pdf]

### **REVIEWER REPORT**

1. There is a word error in line 4 and line 169.
2. Lines 12 and 13 should be expressed more meaningfully.
3. Figures 3a, 3b, 5a, 5b,6 and 8b are not framed.
4. The author should emphasize the importance of this manuscript, its contribution to science in the summary and introduction sections.
5. The conclusions section should be expanded considering all results of this manuscript.
