# Supplementary material for: A geophone-based and low-cost data acquisition and analysis system designed to microtremor measurements
Source: Copernicus journal article supplement (doi:10.5194/gi-2020-11), 2020-05-26
Supplement: Supplementary file [file gi-2020-11-RC3-supplement.pdf]

Manuscript Number: gi-2020-11-AC1.pdf

**REVIEWER REPORT**

All proposed corrections were made by the author. It is suitable to be published.
